# Supplementary material for: Roman pottery production in the coast of Granada (Spain) in the early Late Antiquity: a scientific analysis of ceramics from the kiln site of Los Matagallares
Source: Research Square preprint supplement (doi:10.21203/rs.3.rs-4696732/v1), 2024-08-09
Supplement: Supplementary file 1 [file aff04e9d6ca5cdff575a12c5.xlsx]

## Sheet: Sheet1
Sample	Na2O	MgO	Al2O3	SiO2	P2O5	K2O	CaO	TiO2	Fe2O3	V	Cr	Mn	Ni	Cu	Zn	Rb	Sr	Y	Zr	Ba	La	Ce	Nd	Pb	Th	LOI (%)	Sum (%)
MTG-1	1.52	2.14	17.65	62.33	0.08	1.76	6.52	0.838	6.62	90	96	659	68	30	77	79	233	31	239	535	40	86	36	24	14	1.39	101.082
MTG-2	0.93	2.05	20.79	63.11	0.051	2.47	1.77	0.808	7.95	123	102	530	42	30	74	118	145	35	211	449	41	76	41	32	15	1.17	101.305
MTG-3	0.97	2.09	19.26	63.06	0.054	2.16	3.49	0.87	7.09	114	91	592	42	24	81	113	189	33	243	474	43	87	40	31	15	2.35	101.615
MTG-4	1.06	2.24	17.74	60.6	0.069	1.76	7.33	0.801	6.65	100	87	660	52	31	80	79	185	32	226	489	41	73	39	28	13	2.6	101.072
MTG-5	0.82	1.9	17.59	59.35	0.042	1.69	5.16	0.768	6.58	101	78	475	40	31	63	89	196	28	218	653	38	77	33	25	13	7.24	101.356
MTG-6	0.71	2.1	18.08	64.37	0.062	1.96	4.09	0.826	6.76	110	83	547	46	26	74	92	141	34	250	460	40	87	34	30	14	2.36	101.525
MTG-7	0.84	1.96	17.95	64.14	0.058	2.06	1.9	0.856	6.84	110	91	599	42	26	82	100	178	32	243	839	36	85	32	31	13	4.44	101.298
MTG-8	0.93	1.69	17.48	66.63	0.049	2.06	2.14	0.952	7.34	106	89	783	40	20	75	93	179	37	273	428	42	95	37	27	14	1.41	100.915
MTG-9	0.89	1.89	18.2	64.9	0.045	2.19	2.44	0.855	6.9	105	84	586	39	26	77	111	184	33	245	486	43	85	42	29	13	2.83	101.359
MTG-10	0.97	1.93	18.51	64.23	0.064	2.13	3.12	0.835	7.31	112	92	557	41	34	81	103	159	33	231	438	41	81	33	34	13	1.93	101.237
MTG-11	0.87	1.64	16.53	64.64	0.076	1.94	3.19	0.932	7.42	105	88	909	41	23	82	86	209	38	252	597	45	85	29	35	13	3.84	101.342
MTG-12	0.84	1.8	16.67	64.45	0.058	2	2.92	0.83	6.35	99	82	584	39	28	76	100	185	31	254	479	41	84	40	30	14	4.84	100.975
MTG-13	0.9	1.69	18.75	66.55	0.046	2.28	1.8	0.852	6.97	116	90	546	36	24	74	116	152	33	252	464	41	88	40	30	14	1.05	101.1
MTG-14	0.9	1.77	16.64	64.27	0.071	2.09	4.36	0.783	6.4	105	83	541	39	23	75	101	168	31	236	499	38	80	40	27	13	3.6	101.094
MTG-15	0.84	1.82	18.85	64.29	0.064	2.19	3.07	0.824	7.26	120	91	543	40	21	76	106	159	33	223	418	41	86	40	35	14	1.51	100.923
MTG-16	1.33	2.35	19.21	62.16	0.055	1.57	4.55	0.813	6.78	104	89	725	42	23	81	68	240	31	219	541	41	86	33	30	14	1.69	100.745
MTG-17	0.78	1.73	17.15	69.01	0.04	2.01	1.7	0.843	6.53	103	91	634	44	28	75	98	134	31	264	385	38	94	32	27	11	1.34	101.342
MTG-18	0.98	1.9	19	62.35	0.046	1.94	3.25	0.848	6.9	103	92	575	45	24	78	90	216	32	222	583	40	85	37	29	13	3.92	101.36
MTG-19	0.95	2.06	19.56	63.8	0.055	1.86	2.9	0.879	7.25	119	100	682	50	28	78	90	175	33	224	482	35	84	33	28	15	1.55	101.09
MTG-20	0.65	1.38	22.22	60.95	0.054	2.05	0.94	0.834	10.44	116	100	275	55	31	52	103	107	33	222	409	34	86	37	42	17	1.49	101.18
